# Supplementary material for: Nitrite secretion by cyanobacteria is controlled by the small protein NirP1
Source: bioRxiv preprint, doi:10.1101/2023.08.04.552085, version 1 (2023-08-05)
Supplement: Supplemental Dataset 4 [file 552085_file04.xlsx]

## Sheet: Metabolites_Raw Data
		03/2021 AG Hess - Freibung
		-MS analysis Plant Physiology Rostock (S.Timm)								check												check											check											check
		Carnitine	Standard (single) - 1 mg/ml (1:1000)			partially rather fluctuative				Asparagine	Standard (amino acid mix 1) - 1 mg/ml (1:1000)											Aspartate	Standard (amino acid mix 1) - 1 mg/ml (1:1000)										Serine	Standard (amino acid mix 1) - 1 mg/ml (1:1000)										Alanine	Standard (amino acid mix 1) - 1 mg/ml (1:1000)
						was the std added in a master mix prior extraction?
		Data#	Data Filename	Ret. Time	Area					Data#	Data Filename	Ret. Time	Area									Data#	Data Filename	Ret. Time	Area								Data#	Data Filename	Ret. Time	Area								Data#	Data Filename	Ret. Time	Area
		121	0121 Carnitin 1000 1ul	4.483	7876849					122	0122 AS 1000 1ul	2.112	1454948									122	0122 AS 1000 1ul	2.075	2575116								122	0122 AS 1000 1ul	2.143	4942908								122	0122 AS 1000 1ul	2.447	2867318
		122	0121 Carnitin 1000 1ul	4.478	7898280					121	0122 AS 1000 1ul	2.114	1435091									122	0122 AS 1000 1ul	2.074	2518861								122	0122 AS 1000 1ul	2.145	4944634								122	0122 AS 1000 1ul	2.449	2860717
				MW	7.88756e+06	(corresp. to 1 ng)						MW	1.44502e+06	(corresp. to 1 ng)										MW	2.54699e+06	(corresp. to 1 ng)									MW	4943771	(corresp. to 1 ng)									MW	2.86402e+06	(corresp. to 1 ng)
				StabW	15154							StabW	14041											StabW	39778.3										StabW	1220.47										StabW	4667.61
				% dev	0.192125							% dev	0.971684											% dev	1.56178										% dev	0.024687										% dev	0.162974
		Zellextrakte	(dissolved in 1000 µl; 5 µl injected)														Peak area	Peak area											Peak area	Peak area										Peak area	Peak area
													Peak area	Total volume	Peak area	Factor IT	per total sample	per total sample	normalization to FW/DW/OD						Peak area	Total volume	Peak area	Factor IT	per total sample	per total sample	normalization to FW/DW/OD					Peak area	Total volume	Peak area	Factor IT	per total sample	per total sample	normalization to FW/DW/OD					Peak area	Total volume	Peak area
		Data#	Data Filename	Ret. Time	Area	Factor	Area/whole sample			Data#	Data Filename	Ret. Time	undiluted	of the sample	per total sample		normalized to IT	normalized to Std (ng)	needs to be done here			Data#	Data Filename	Ret. Time	undiluted	of the sample	per total sample		normalized to IT	normalized to Std (ng)	needs to be done here		Data#	Data Filename	Ret. Time	undiluted	of the sample	per total sample		normalized to IT	normalized to Std (ng)	needs to be done here		Data#	Data Filename	Ret. Time	undiluted	of the sample	per total sample
0.8		1	0001 WT1 Oh 5ul	4.41	34570174	0.724406	6914034800			1	0001 WT1 Oh 5ul	2.112	16399	1000	3279800	0.755921	2.47927e+06	1.71574	1.37259			1	0001 WT1 Oh 5ul	2.112	596655	1000	119331000	0.755921	9.02049e+07	35.4163	28.333		1	0001 WT1 Oh 5ul	2.167	789337	1000	157867400	0.755921	1.19335e+08	24.1385	19.3108		1	0001 WT1 Oh 5ul	2.467	945305	1000	189061000
0.755287		2	0002 WT2 Oh 5ul	4.413	25927485	0.96588	5185497000			2	0002 WT2 Oh 5ul	2.183	18242	1000	3648400	1.0079	3.67723e+06	2.54476	1.92202			2	0002 WT2 Oh 5ul	2.111	389282	1000	77856400	1.0079	7.84715e+07	30.8095	23.27		2	0002 WT2 Oh 5ul	2.155	711547	1000	142309400	1.0079	1.43434e+08	29.013	21.9132		2	0002 WT2 Oh 5ul	2.456	771267	1000	154253400
0.768049		3	0003 WT1 1h 5ul	4.414	34428015	0.727397	6885603000			3	0003 WT1 1h 5ul	2.251	18361	1000	3672200	0.759043	2.78736e+06	1.92894	1.48152			3	0003 WT1 1h 5ul	2.1	725966	1000	145193200	0.759043	1.10208e+08	43.2699	33.2334		3	0003 WT1 1h 5ul	2.17	921507	1000	184301400	0.759043	1.39893e+08	28.2967	21.7333		3	0003 WT1 1h 5ul	2.458	964486	1000	192897200
0.726744		4	0004 WT2 1h 5ul	4.421	34927713	0.716991	6985542600			4	0004 WT2 1h 5ul	2.117	28360	1000	5672000	0.748183	4.2437e+06	2.93677	2.13428			4	0004 WT2 1h 5ul	2.101	837670	1000	167534000	0.748183	1.25346e+08	49.2135	35.7656		4	0004 WT2 1h 5ul	2.172	1146034	1000	229206800	0.748183	1.71489e+08	34.6878	25.2092		4	0004 WT2 1h 5ul	2.46	1245250	1000	249050000
0.69735		5	0005 WT1 3h 5ul	4.419	23719849	1.05578	4743969800			5	0005 WT1 3h 5ul	2.323	19227	1000	3845400	1.10171	4.23651e+06	2.9318	2.04449			5	0005 WT1 3h 5ul	2.094	366152	1000	73230400	1.10171	8.06785e+07	31.676	22.0893		5	0005 WT1 3h 5ul	2.173	539718	1000	107943600	1.10171	1.18922e+08	24.055	16.7747		5	0005 WT1 3h 5ul	2.454	357022	1000	71404400
0.673854		6	0006 WT2 3h 5ul	4.412	24897988	1.00582	4979597600			6	0006 WT2 3h 5ul	2.128	20208	1000	4041600	1.04958	4.24197e+06	2.93558	1.97815			6	0006 WT2 3h 5ul	2.096	348322	1000	69664400	1.04958	7.31181e+07	28.7077	19.3448		6	0006 WT2 3h 5ul	2.163	477191	1000	95438200	1.04958	1.0017e+08	20.2618	13.6535		6	0006 WT2 3h 5ul	2.461	452812	1000	90562400
0.554324		7	0009 WT1 12h 5ul	4.414	33535187	0.746763	6707037400			9	0009 WT1 12h 5ul	2.129	25542	1000	5108400	0.779251	3.98073e+06	2.75479	1.52705			9	0009 WT1 12h 5ul	2.133	221931	1000	44386200	0.779251	3.4588e+07	13.58	7.52769		9	0009 WT1 12h 5ul	2.184	325911	1000	65182200	0.779251	5.07933e+07	10.2742	5.69523		9	0009 WT1 12h 5ul	2.458	464040	1000	92808000
0.546448		8	0010 WT2 12h 5ul	4.417	35267470	0.710083	7053494000			10	0010 WT2 12h 5ul	2.234	33008	1000	6601600	0.740976	4.89162e+06	3.38516	1.84982			10	0010 WT2 12h 5ul	2.223	261510	1000	52302000	0.740976	3.87545e+07	15.2158	8.31465		10	0010 WT2 12h 5ul	2.192	386529	1000	77305800	0.740976	5.72817e+07	11.5866	6.3315		10	0010 WT2 12h 5ul	2.465	478142	1000	95628400
0.375094		9	0011 WT1 24h 5ul	4.412	29288154	0.85505	5857630800			11	0011 WT1 24h 5ul	2.126	36508	1000	7301600	0.892249	6.51485e+06	4.50848	1.6911			11	0011 WT1 24h 5ul	2.112	546266	1000	109253200	0.892249	9.74811e+07	38.2731	14.356		11	0011 WT1 24h 5ul	2.161	492929	1000	98585800	0.892249	8.79631e+07	17.7927	6.67394		11	0011 WT1 24h 5ul	2.471	560224	1000	112044800
0.363372		10	0012 WT2 24h 5ul	4.412	14784562	1.69385	2956912400			12	0012 WT2 24h 5ul	2.103	17496	1000	3499200	1.76754	6.18498e+06	4.28021	1.55531			12	0012 WT2 24h 5ul	2.122	244972	1000	48994400	1.76754	8.65997e+07	34.0008	12.3549		12	0012 WT2 24h 5ul	2.184	234939	1000	46987800	1.76754	8.30529e+07	16.7995	6.10447		12	0012 WT2 24h 5ul	2.456	257555	1000	51511000
0.635324		11	0013 Delta NirP1_1 0h 5ul	4.416	19849442	1.26164	3969888400			13	0013 Delta NirP1_1 0h 5ul	2.058	9257	1000	1851400	1.31653	2.43742e+06	1.68677	1.07165			13	0013 Delta NirP1_1 0h 5ul	2.103	709571	1000	141914200	1.31653	1.86834e+08	73.3548	46.6041		13	0013 Delta NirP1_1 0h 5ul	2.161	526700	1000	105340000	1.31653	1.38683e+08	28.0521	17.8222		13	0013 Delta NirP1_1 0h 5ul	2.454	619465	1000	123893000
0.632111		12	0014 Delta NirP1_2 0h 5ul	4.419	23337224	1.07309	4667444800			14	0014 Delta NirP1_2 0h 5ul	2.159	19173	1000	3834600	1.11977	4.29387e+06	2.9715	1.87832			14	0014 Delta NirP1_2 0h 5ul	2.093	813720	1000	162744000	1.11977	1.82236e+08	71.5496	45.2273		14	0014 Delta NirP1_2 0h 5ul	2.165	654726	1000	130945200	1.11977	1.46629e+08	29.6593	18.748		14	0014 Delta NirP1_2 0h 5ul	2.466	708911	1000	141782200
0.600962		13	0015 Delta NirP1_1 1h 5ul	4.409	15804456	1.58454	3160891200			15	0015 Delta NirP1_1 1h 5ul	2.165	29741	1000	5948200	1.65348	9.83522e+06	6.80629	4.09032			15	0015 Delta NirP1_1 1h 5ul	2.096	720135	1000	144027000	1.65348	2.38146e+08	93.5009	56.1904		15	0015 Delta NirP1_1 1h 5ul	2.169	1562658	1000	312531600	1.65348	5.16764e+08	104.528	62.8175		15	0015 Delta NirP1_1 1h 5ul	2.467	664265	1000	132853000
0.613497		14	0016 Delta NirP1_2 1h 5ul	4.414	24991160	1.00207	4998232000			16	0016 Delta NirP1_2 1h 5ul	2.253	22407	1000	4481400	1.04566	4.68604e+06	3.24289	1.9895			16	0016 Delta NirP1_2 1h 5ul	2.091	581576	1000	116315200	1.04566	1.21627e+08	47.7531	29.2964		16	0016 Delta NirP1_2 1h 5ul	2.178	474255	1000	94851000	1.04566	9.91822e+07	20.0621	12.308		16	0016 Delta NirP1_2 1h 5ul	2.462	781021	1000	156204200
0.550055		15	0017 Delta NirP1_1 3h 5ul	4.407	19117412	1.30995	3823482400			17	0017 Delta NirP1_1 3h 5ul	2.229	18330	1000	3666000	1.36694	5.0112e+06	3.46791	1.90754			17	0017 Delta NirP1_1 3h 5ul	2.11	285569	1000	57113800	1.36694	7.80711e+07	30.6523	16.8605		17	0017 Delta NirP1_1 3h 5ul	2.172	199195	1000	39839000	1.36694	5.44575e+07	11.0154	6.05906		17	0017 Delta NirP1_1 3h 5ul	2.447	278798	1000	55759600
0.572082		16	0018 Delta NirP1_2 3h 5ul	4.412	18213346	1.37497	3642669200			18	0018 Delta NirP1_2 3h 5ul	2.099	15643	1000	3128600	1.43479	4.48889e+06	3.10645	1.77715			18	0018 Delta NirP1_2 3h 5ul	2.096	357396	1000	71479200	1.43479	1.02558e+08	40.2663	23.0356		18	0018 Delta NirP1_2 3h 5ul	2.173	207963	1000	41592600	1.43479	5.96767e+07	12.0711	6.90565		18	0018 Delta NirP1_2 3h 5ul	2.452	291363	1000	58272600
0.456204		17	0021 Delta NirP1_1 12h 5ul	4.41	23301608	1.07473	4660321600			21	0021 Delta NirP1_1 12h 5ul	2.204	34141	1000	6828200	1.12148	7.6577e+06	5.29938	2.4176			21	0021 Delta NirP1_1 12h 5ul	2.097	641664	1000	128332800	1.12148	1.43923e+08	56.5071	25.7788		21	0021 Delta NirP1_1 12h 5ul	2.167	518326	1000	103665200	1.12148	1.16259e+08	23.5162	10.7282		21	0021 Delta NirP1_1 12h 5ul	2.463	319838	1000	63967600
0.459559		18	0022 Delta NirP1_2 12h 5ul	4.413	20715636	1.20889	4143127200			22	0022 Delta NirP1_2 12h 5ul	2.134	25297	1000	5059400	1.26148	6.38233e+06	4.41677	2.02977			22	0022 Delta NirP1_2 12h 5ul	2.089	621730	1000	124346000	1.26148	1.5686e+08	61.5864	28.3026		22	0022 Delta NirP1_2 12h 5ul	2.156	383318	1000	76663600	1.26148	9.67095e+07	19.5619	8.98984		22	0022 Delta NirP1_2 12h 5ul	2.456	292085	1000	58417000
0.319489		19	0023 Delta NirP1_1 124 5ul	4.411	16253696	1.54075	3250739200			23	0023 Delta NirP1_1 124 5ul	2.161	23906	1000	4781200	1.60778	7.68711e+06	5.31973	1.69959			23	0023 Delta NirP1_1 124 5ul	2.101	579281	1000	115856200	1.60778	1.86271e+08	73.1338	23.3654		23	0023 Delta NirP1_1 124 5ul	2.161	355811	1000	71162200	1.60778	1.14413e+08	23.1429	7.39389		23	0023 Delta NirP1_1 124 5ul	2.462	309627	1000	61925400
0.329815		20	0024 Delta NirP1_2 124 5ul	4.417	16131592	1.55241	3226318400			24	0024 Delta NirP1_2 124 5ul	2.138	32715	1000	6543000	1.61995	1.05993e+07	7.33507	2.41922			24	0024 Delta NirP1_2 124 5ul	2.102	564653	1000	112930600	1.61995	1.82942e+08	71.8267	23.6895		24	0024 Delta NirP1_2 124 5ul	2.174	669056	1000	133811200	1.61995	2.16767e+08	43.8465	14.4613		24	0024 Delta NirP1_2 124 5ul	2.462	432831	1000	86566200
0.675676		21	0025 NirP1_ OE1 0h 5ul	4.405	16480561	1.51954	3296112200			37	0037 NirP1_ OE1 0h 5ul	2.209	20699	1000	4139800	1.58565	6.56426e+06	4.54268	3.06938			37	0037 NirP1_ OE1 0h 5ul	2.08	613974	1000	122794800	1.58565	1.94709e+08	76.4468	51.6532		37	0037 NirP1_ OE1 0h 5ul	2.174	412630	1000	82526000	1.58565	1.30857e+08	26.4691	17.8845		37	0037 NirP1_ OE1 0h 5ul	2.457	310419	1000	62083800
0.68306		22	0026 NirP1_ OE2 0h 5ul	4.411	18437867	1.35823	3687573400			38	0038 NirP1_ OE2 0h 5ul	2.126	16026	1000	3205200	1.41732	4.54279e+06	3.14376	2.14738			38	0038 NirP1_ OE2 0h 5ul	2.103	648376	1000	129675200	1.41732	1.83791e+08	72.1602	49.2897		38	0038 NirP1_ OE2 0h 5ul	2.161	424835	1000	84967000	1.41732	1.20425e+08	24.359	16.6387		38	0038 NirP1_ OE2 0h 5ul	2.474	323892	1000	64778400
0.642674		23	0027 NirP1_ OE1 1h 5ul	4.417	20960340	1.19477	4192068000			39	0039 NirP1_ OE1 1h 5ul	2.151	20933	1000	4186600	1.24675	5.21965e+06	3.61217	2.32144			39	0039 NirP1_ OE1 1h 5ul	2.102	638941	1000	127788200	1.24675	1.5932e+08	62.5524	40.2007		39	0039 NirP1_ OE1 1h 5ul	2.166	428900	1000	85780000	1.24675	1.06946e+08	21.6325	13.9027		39	0039 NirP1_ OE1 1h 5ul	2.448	571933	1000	114386600
0.65703		24	0028 NirP1_ OE2 1h 5ul	4.413	35108481	0.713299	7021696200			40	0040 NirP1_ OE2 1h 5ul	2.181	25381	1000	5076200	0.744331	3.77837e+06	2.61476	1.71797			40	0040 NirP1_ OE2 1h 5ul	2.101	1006303	1000	201260600	0.744331	1.49805e+08	58.8163	38.6441		40	0040 NirP1_ OE2 1h 5ul	2.153	619883	1000	123976600	0.744331	9.22796e+07	18.6658	12.264		40	0040 NirP1_ OE2 1h 5ul	2.459	1003434	1000	200686800
0.589623		25	0029 NirP1_ OE1 3h 5ul	4.413	28018551	0.893795	5603710200			41	0041 NirP1_ OE1 3h 5ul	2.149	16787	1000	3357400	0.93268	3.13138e+06	2.16702	1.27772			41	0041 NirP1_ OE1 3h 5ul	2.096	564321	1000	112864200	0.93268	1.05266e+08	41.3297	24.3689		41	0041 NirP1_ OE1 3h 5ul	2.171	409398	1000	81879600	0.93268	7.63674e+07	15.4472	9.10802		41	0041 NirP1_ OE1 3h 5ul	2.471	588641	1000	117728200
0.579374		26	0030 NirP1_ OE2 3h 5ul	4.41	22760347	1.10028	4552069400			42	0042 NirP1_ OE2 3h 5ul	2.095	10638	1000	2127600	1.14815	2.44281e+06	1.6905	0.979433			42	0042 NirP1_ OE2 3h 5ul	2.098	458454	1000	91690800	1.14815	1.05275e+08	41.3331	23.9473		42	0042 NirP1_ OE2 3h 5ul	2.169	238407	1000	47681400	1.14815	5.47455e+07	11.0736	6.41578		42	0042 NirP1_ OE2 3h 5ul	2.457	408683	1000	81736600
0.469484		27	0033 NirP1_ OE1 12h 5ul	4.412	29794254	0.840526	5958850800			45	0045 NirP1_ OE1 12h 5ul	2.133	22684	1000	4536800	0.877093	3.9792e+06	2.75373	1.29283			45	0045 NirP1_ OE1 12h 5ul	2.109	1048912	1000	209782400	0.877093	1.83999e+08	72.2417	33.9163		45	0045 NirP1_ OE1 12h 5ul	2.163	465048	1000	93009600	0.877093	8.15781e+07	16.5012	7.74704		45	0045 NirP1_ OE1 12h 5ul	2.459	888010	1000	177602000
0.466418		28	0034 NirP1_ OE2 12h 5ul	4.417	24542560	1.02038	4908512000			46	0046 NirP1_ OE2 12h 5ul	2.12	19855	1000	3971000	1.06478	4.22823e+06	2.92607	1.36477			46	0046 NirP1_ OE2 12h 5ul	2.093	900737	1000	180147400	1.06478	1.91817e+08	75.3112	35.1265		46	0046 NirP1_ OE2 12h 5ul	2.158	490271	1000	98054200	1.06478	1.04406e+08	21.1187	9.85012		46	0046 NirP1_ OE2 12h 5ul	2.453	721679	1000	144335800
0.321543		29	0035 NirP1_ OE1 24h 5ul	4.421	27336177	0.916106	5467235400			47	0047 NirP1_ OE1 24h 5ul	2.089	24199	1000	4839800	0.955962	4.62666e+06	3.2018	1.02952			47	0047 NirP1_ OE1 24h 5ul	2.097	1742963	1000	348592600	0.955962	3.33241e+08	130.837	42.0699		47	0047 NirP1_ OE1 24h 5ul	2.163	675510	1000	135102000	0.955962	1.29152e+08	26.1243	8.40008		47	0047 NirP1_ OE1 24h 5ul	2.465	1437911	1000	287582200
0.315259		30	0036 NirP1_ OE2 24h 5ul	4.414	38784049	0.6457	7756809800			48	0048 NirP1_ OE2 24h 5ul	2.138	40124	1000	8024800	0.673791	5.40704e+06	3.74184	1.17965			48	0048 NirP1_ OE2 24h 5ul	2.095	2805386	1000	561077200	0.673791	3.78049e+08	148.43	46.7937		48	0048 NirP1_ OE2 24h 5ul	2.162	1173869	1000	234773800	0.673791	1.58188e+08	31.9975	10.0875		48	0048 NirP1_ OE2 24h 5ul	2.461	2195816	1000	439163200
				MW	2.50428e+07
				StabW	6.99834e+06
				% div	27.9455
[truncated: 337 more columns]

## Sheet: Normalisation_Values
No	Sample	OD	Vol	Od/Vol	Norm to 1 OD/Vol ≙ Faktor
1	WT1_0h	0.625	2	1.25	0.8
2	WT2_0h	0.662	2	1.324	0.755287
3	WT1_1h	0.651	2	1.302	0.768049
4	WT2_1h	0.688	2	1.376	0.726744
5	WT1_3h	0.717	2	1.434	0.69735
6	WT2_3h	0.742	2	1.484	0.673854
7	WT1_12h	0.902	2	1.804	0.554324
8	WT2_12h	0.915	2	1.83	0.546448
9	WT1_24h	1.333	2	2.666	0.375094
10	WT2_24h	1.376	2	2.752	0.363372
11	Delta-NirP1_1_0h	0.787	2	1.574	0.635324
12	Delta-NirP1_2_0h	0.791	2	1.582	0.632111
13	Delta-NirP1_1_1h	0.832	2	1.664	0.600962
14	Delta-NirP1_2_1h	0.815	2	1.63	0.613497
15	Delta-NirP1_1_3h	0.909	2	1.818	0.550055
16	Delta-NirP1_2_3h	0.874	2	1.748	0.572082
17	Delta-NirP1_1_12h	1.096	2	2.192	0.456204
18	Delta-NirP1_2_12h	1.088	2	2.176	0.459559
19	Delta-NirP1_1_24h	1.565	2	3.13	0.319489
20	Delta-NirP1_2_24h	1.516	2	3.032	0.329815
21	NirP1_OE1_0h	0.74	2	1.48	0.675676
22	NirP1_OE2_0h	0.732	2	1.464	0.68306
23	NirP1_OE1_1h	0.778	2	1.556	0.642674
24	NirP1_OE2_1h	0.761	2	1.522	0.65703
25	NirP1_OE1_3h	0.848	2	1.696	0.589623
26	NirP1_OE2_3h	0.863	2	1.726	0.579374
27	NirP1_OE1_12h	1.065	2	2.13	0.469484
28	NirP1_OE2_12h	1.072	2	2.144	0.466418
29	NirP1_OE1_24h	1.555	2	3.11	0.321543
30	NirP1_OE2_24h	1.586	2	3.172	0.315259

## Sheet: Total_AA
Values
Norm to OD/Vol =1
	0001 WT1 0h	0002 WT2 0h	0003 WT1 1h	0004 WT2 1h	0005 WT1 3h	0006 WT2 3h	0007 WT1 12h	0008 WT2 12h	0009 WT1 24h	0010 WT2 24h	0011 ΔnirP1_1 0h Δ	0012 ΔnirP1_2 0h	0013 ΔnirP1_1 1h	0014 ΔnirP1_2 1h	0015 ΔnirP1_1 3h	0016 ΔnirP1_2 3h	0017 ΔnirP1_1 12h	0018 ΔnirP1_2 12h	0019 ΔnirP1_1 124	0020 ΔnirP1_2 124	0021 NirP1oex1 0h	0022 NirP1oex2 0h	0023 NirP1oex1 1h	0024 NirP1oex2 1h	0025 NirP1oex1 3h	0026 NirP1oex2 3h	0027 NirP1oex1 12h	0028 NirP1oex2 12h	0029 NirP1oex1 24h	0030 NirP1oex2 24h
Asparagine	1.37259	1.92202	1.48152	2.13428	2.04449	1.97815	1.52705	1.84982	1.6911	1.55531	1.07165	1.87832	4.09032	1.9895	1.90754	1.77715	2.4176	2.02977	1.69959	2.41922	3.06938	2.14738	2.32144	1.71797	1.27772	0.979433	1.29283	1.36477	1.02952	1.17965
Aspartate	28.333	23.27	33.2334	35.7656	22.0893	19.3448	7.52769	8.31465	14.356	12.3549	46.6041	45.2273	56.1904	29.2964	16.8605	23.0356	25.7788	28.3026	23.3654	23.6895	51.6532	49.2897	40.2007	38.6441	24.3689	23.9473	33.9163	35.1265	42.0699	46.7937
Serine	19.3108	21.9132	21.7333	25.2092	16.7747	13.6535	5.69523	6.3315	6.67394	6.10447	17.8222	18.748	62.8175	12.308	6.05906	6.90565	10.7282	8.98984	7.39389	14.4613	17.8845	16.6387	13.9027	12.264	9.10802	6.41578	7.74704	9.85012	8.40008	10.0875
Alanine	39.9202	41.0005	39.265	47.2825	19.1543	22.3641	13.9975	13.5196	13.0931	11.5517	36.1823	35.0404	46.0936	34.9882	14.6386	16.7007	11.4271	11.8246	11.1064	16.149	23.2245	21.8968	32.0015	34.2685	22.6054	18.9845	25.5351	25.0283	30.865	32.5718
Glycine	6.79768	7.58522	10.5743	9.07315	9.10962	7.87622	6.69181	7.46369	6.02289	7.43113	5.71239	7.92826	27.1569	6.84121	5.86864	5.05166	7.72455	7.73353	6.67154	27.2358	10.2202	8.54546	6.92455	6.93772	5.85335	4.97829	5.72625	5.18214	5.39711	5.53036
Glutamine	18.5272	12.5698	24.2096	25.1757	29.7663	48.866	25.5611	39.9962	36.032	33.1276	22.0029	28.0195	39.3974	29.5694	43.1347	38.2813	23.401	33.7352	39.8542	51.4596	17.9881	17.8378	40.5507	41.3065	13.1217	13.4496	35.6926	24.5352	12.1443	20.9793
Threonine	8.63671	9.95066	11.326	12.5346	10.9474	9.13862	8.15277	9.47726	8.90009	7.82355	9.85257	10.3951	18.4895	9.64456	7.55614	8.42231	7.73138	9.72522	6.97866	9.98735	9.5926	8.3129	8.34873	9.47638	8.14424	7.64721	8.11715	8.75088	7.38872	9.20142
Glutamate	499.26	495.192	445.914	456.87	342.949	413.86	325.073	380.129	452.553	395.521	583.869	555.125	489.458	498.79	344.16	360.673	366.449	418	380.857	446.926	607.297	556.142	508.29	561.593	408.154	406.637	656.32	560.887	694.79	742.598
Proline	2.80571	3.09459	4.27615	2.69309	4.66221	1.79735	1.18375	1.19075	1.308	1.55666	3.20829	4.07914	7.00069	2.8817	2.85607	2.59204	1.17365	0.94041	0.662008	1.6913	4.27431	3.57091	2.89332	2.87878	2.06444	2.24337	1.11387	1.23729	0.915006	1.00374
Lysine	18.75	12.2527	24.1097	25.281	30.0025	48.4295	25.4454	41.1855	35.3969	32.3144	21.8292	26.8625	38.448	29.8621	42.5284	38.0044	22.7203	33.2286	39.675	51.3857	18.2091	18.1	39.9535	41.4116	13.1983	14.0259	35.8888	25.0557	12.381	20.8684
Histidine	1.96759	1.43007	3.00485	3.00398	1.29552	2.14311	1.1628	1.28367	0.792326	1.07589	1.39594	1.5363	9.05659	1.29425	1.23796	1.14343	1.44275	0.98402	0.876739	1.78234	2.09339	1.70537	2.04467	1.87032	1.37354	0.86902	0.722821	1.74667	0.704541	0.849305
Arginine	19.4997	12.8072	13.6194	7.00056	13.2378	11.6114	6.98414	8.99707	8.99583	8.05999	17.8956	22.7078	13.4632	17.506	12.4914	19.0074	11.5921	14.1778	7.66408	10.2739	7.22002	11.1806	10.5096	11.866	6.61427	11.3297	5.19176	5.91926	4.83467	6.57544
Valine	4.47486	4.73741	4.15117	5.66194	2.90499	2.74912	2.22173	2.35797	2.05422	1.91032	4.80303	5.18429	10.1267	3.63599	2.39669	2.39043	2.61604	2.7724	2.16522	2.91071	5.97812	4.60804	3.91005	3.80547	3.95974	3.49702	3.89456	3.8431	4.97504	5.0925
Methionine	2.05294	2.29987	2.16433	1.99129	1.84951	1.30073	2.27877	2.00095	1.64581	1.56776	2.69854	2.89197	2.70088	2.24938	1.47995	1.73871	2.12349	2.22043	1.39391	2.22034	1.86816	1.59807	1.48012	1.39256	1.43048	1.51158	1.29594	1.11396	0.653223	0.414869
Tyrosine	2.98989	2.2381	2.60066	2.79294	1.9895	2.11198	2.346	2.6734	1.72434	1.6969	2.26799	2.49397	6.40655	1.67096	1.48611	1.40625	1.72796	1.74318	1.19842	1.94944	3.0356	2.99887	2.35037	2.70472	2.30345	1.7752	2.60242	2.07975	1.96304	2.46008
Isoleucine	3.11123	2.75314	3.08186	3.85063	2.50353	2.04025	1.79684	2.32525	1.50509	1.34238	3.08619	3.47753	7.67766	2.42096	1.6331	2.09682	1.96428	2.15942	1.50618	2.46226	4.1242	3.35277	2.62646	2.56829	2.58856	2.09414	2.28092	2.32637	2.25199	2.86999
Leucine	3.48039	3.45765	3.37391	4.16538	2.15064	2.16659	2.79984	2.86106	2.2229	2.06603	3.82664	4.00393	7.5348	2.92806	2.27487	2.19251	2.66294	2.43617	2.32839	2.66926	4.06588	3.21754	2.86399	3.27033	4.10623	3.30897	3.58532	3.65805	3.67573	3.66669
Phenylalanine	3.14554	2.38741	2.8852	3.30806	2.32496	1.91479	3.12693	3.40336	2.19136	2.09381	2.2979	3.01027	7.54839	2.01836	2.0151	2.00602	2.81985	2.61833	2.07978	2.96228	3.53084	3.07456	2.6654	2.87675	2.36012	2.18045	2.22055	2.26944	1.81993	2.1613
Tryptophan	1.22724	0.965904	0.950404	1.21852	0.866744	0.790359	0.957044	1.02209	0.847045	0.877346	0.888945	1.06499	3.11097	0.795883	0.759903	0.857871	1.08009	0.926303	0.8672	1.21217	1.32406	1.31334	1.10349	1.03354	0.660405	0.658725	0.573829	0.585202	0.495489	0.618998
*strange value /strange fluctuation
Gesamt	685.663	661.827	651.954	675.013	516.623	614.137	444.529	536.383	598.006	530.031	787.316	779.675	856.768	690.691	511.344	534.283	507.581	584.548	538.344	673.848	796.654	735.531	724.941	781.887	533.293	526.533	833.718	720.56	836.754	915.524
Average
	WT 0h	Std	WT 1h	Std	WT 3h	Std	WT 12h	Std	WT 24h	Std	ΔnirP1 0h	Std	ΔnirP1 1h	Std	ΔnirP1 3h	Std	ΔnirP1 12h	Std	ΔnirP1 24h	Std	NirP1oex 0h	Std	NirP1oex 1h	Std	NirP1oex 3h	Std	NirP1oex 12h	Std	NirP1oex 24h	Std
Asparagine	1.64731	0.274717	1.8079	0.326381	2.01132	0.0331689	1.68843	0.161385	1.62321	0.0678982	1.47498	0.403335	3.03991	1.05041	1.84234	0.0651972	2.22368	0.193916	2.05941	0.359812	2.60838	0.461001	2.01971	0.301735	1.12858	0.149144	1.3288	0.0359696	1.10458	0.0750652
Aspartate	25.8015	2.53149	34.4995	1.26611	20.717	1.37225	7.92117	0.39348	13.3555	1.00052	45.9157	0.688402	42.7434	13.447	19.948	3.08758	27.0407	1.26189	23.5275	0.162043	50.4715	1.18175	39.4224	0.778316	24.1581	0.210779	34.5214	0.6051	44.4318	2.36192
Serine	20.612	1.30117	23.4712	1.73795	15.2141	1.56062	6.01337	0.318132	6.3892	0.284733	18.2851	0.462899	37.5628	25.2548	6.48236	0.423296	9.85901	0.869175	10.9276	3.53368	17.2616	0.622922	13.0833	0.819321	7.7619	1.34612	8.79858	1.05154	9.24379	0.843705
Alanine	40.4604	0.540129	43.2738	4.00876	20.7592	1.60492	13.7586	0.23895	12.3224	0.770698	35.6113	0.570974	40.5409	5.55274	15.6697	1.03108	11.6258	0.198723	13.6277	2.52126	22.5607	0.663861	33.135	1.1335	20.7949	1.81043	25.2817	0.253403	31.7184	0.853412
Glycine*	7.19145	0.393772	9.82373	0.750583	8.49292	0.6167	7.07775	0.385939	6.72701	0.70412	6.82032	1.10794	16.999	10.1578	5.46015	0.408489	7.72904	0.00448961	16.9537	10.2821	9.38282	0.837366	6.93113	0.00658369	5.41582	0.437532	5.45419	0.272058	5.46374	0.0666249
Glutamine	15.5485	2.97873	24.6926	0.48306	39.3161	9.54984	32.7786	7.21758	34.5798	1.4522	25.0112	3.00831	34.4834	4.914	40.708	2.42671	28.5681	5.1671	45.6569	5.80267	17.913	0.075165	40.9286	0.377872	13.2857	0.163939	30.1139	5.57867	16.5618	4.41753
Threonine	9.29369	0.656976	11.9303	0.604294	10.043	0.904391	8.81502	0.662248	8.36182	0.538269	10.1238	0.271252	14.067	4.42248	7.98923	0.433087	8.7283	0.996923	8.483	1.50435	8.95275	0.63985	8.91255	0.563827	7.89573	0.248513	8.43401	0.316862	8.29507	0.906347
Glutamate	497.226	2.03404	451.392	5.47846	378.405	35.4557	352.601	27.5283	424.037	28.5162	569.497	14.3721	494.124	4.66595	352.416	8.25684	392.224	25.7753	413.892	33.0345	581.72	25.5778	534.942	26.6517	407.396	0.758958	608.603	47.7166	718.694	23.9042
Proline	2.95015	0.144439	3.48462	0.791529	3.22978	1.43243	1.18725	0.00349934	1.43233	0.124331	3.64371	0.435423	4.9412	2.0595	2.72406	0.132016	1.05703	0.11662	1.17666	0.514648	3.92261	0.351698	2.88605	0.0072699	2.15391	0.0894659	1.17558	0.0617077	0.959374	0.0443687
Lysine	15.5013	3.24865	24.6953	0.58564	39.216	9.21347	33.3155	7.87003	33.8557	1.54127	24.3458	2.51664	34.1551	4.29296	40.2664	2.26201	27.9745	5.25417	45.5304	5.85533	18.1545	0.0545789	40.6826	0.72904	13.6121	0.413801	30.4722	5.41657	16.6247	4.24373
Histidine	1.69883	0.268759	3.00441	0.000435559	1.71931	0.423795	1.22323	0.0604348	0.934106	0.14178	1.46612	0.0701807	5.17542	3.88117	1.19069	0.0472685	1.21338	0.229364	1.32954	0.452803	1.89938	0.194014	1.9575	0.0871753	1.12128	0.252262	1.23475	0.511925	0.776923	0.072382
Arginine	16.1534	3.34625	10.31	3.30943	12.4246	0.813171	7.9906	1.00647	8.52791	0.467916	20.3017	2.40611	15.4846	2.0214	15.7494	3.25801	12.885	1.29285	8.96899	1.30491	9.20033	1.98031	11.1878	0.678183	8.97201	2.35774	5.55551	0.363753	5.70505	0.870388
Valine	4.60614	0.131278	4.90655	0.755388	2.82706	0.0779344	2.28985	0.0681178	1.98227	0.0719461	4.99366	0.190628	6.88133	3.24534	2.39356	0.00312894	2.69422	0.0781791	2.53797	0.372749	5.29308	0.685042	3.85776	0.0522923	3.72838	0.231358	3.86883	0.0257314	5.03377	0.0587315
Methionine	2.17641	0.123465	2.07781	0.0865174	1.57512	0.274387	2.13986	0.138908	1.60679	0.0390212	2.79525	0.0967144	2.47513	0.225752	1.60933	0.129378	2.17196	0.0484688	1.80713	0.413216	1.73312	0.135045	1.43634	0.0437784	1.47103	0.0405507	1.20495	0.0909893	0.534046	0.119177
Tyrosine	2.614	0.375896	2.6968	0.0961443	2.05074	0.0612391	2.5097	0.163701	1.71062	0.0137169	2.38098	0.112991	4.03876	2.3678	1.44618	0.0399273	1.73557	0.00761066	1.57393	0.37551	3.01724	0.0183647	2.52755	0.177176	2.03933	0.264129	2.34108	0.261336	2.21156	0.248519
Isoleucine	2.93219	0.179046	3.46624	0.384386	2.27189	0.231639	2.06104	0.264203	1.42373	0.0813547	3.28186	0.19567	5.04931	2.62835	1.86496	0.23186	2.06185	0.0975691	1.98422	0.47804	3.73849	0.385717	2.59737	0.0290852	2.34135	0.247214	2.30365	0.0227272	2.56099	0.309003
Leucine	3.46902	0.0113714	3.76964	0.395735	2.15862	0.00797559	2.83045	0.0306073	2.14447	0.0784385	3.91529	0.0886466	5.23143	2.30337	2.23369	0.0411827	2.54956	0.113383	2.49882	0.170433	3.64171	0.424168	3.06716	0.203171	3.7076	0.398629	3.62168	0.0363673	3.67121	0.00451969
Phenylalanine	2.76648	0.379066	3.09663	0.211433	2.11987	0.205081	3.26514	0.138216	2.14259	0.048772	2.65409	0.356186	4.78338	2.76501	2.01056	0.00453816	2.71909	0.100759	2.52103	0.441249	3.3027	0.228141	2.77108	0.105677	2.27029	0.0898371	2.245	0.024446	1.99061	0.170685
Tryptophan	1.09657	0.130667	1.08446	0.134057	0.828552	0.0381923	0.989566	0.0325217	0.862195	0.0151506	0.97697	0.0880246	1.95343	1.15754	0.808887	0.0489839	1.0032	0.0768936	1.03969	0.172487	1.3187	0.00535935	1.06851	0.0349786	0.659565	0.000839693	0.579515	0.00568643	0.557244	0.0617546
Total AS	673.745	11.918	663.484	11.5293	565.38	48.757	490.456	45.927	564.018	33.9876	783.495	3.82053	773.73	83.0387	522.814	11.4696	546.064	38.4832	606.096	67.7519	766.092	30.5616	753.414	28.4728	529.913	3.38025	777.139	56.5792	876.139	39.3847
	0h	1h	3h	12h	24h
WT	1.64731	1.8079	2.01132	1.68843	1.62321	Asparagine
ΔnirP1	1.47498	3.03991	1.84234	2.22368	2.05941
NirP1oex	2.60838	2.01971	1.12858	1.3288	1.10458
WT	25.8015	34.4995	20.717	7.92117	13.3555	Aspartate
ΔnirP1	45.9157	42.7434	19.948	27.0407	23.5275
NirP1oex	50.4715	39.4224	24.1581	34.5214	44.4318
WT	20.612	23.4712	15.2141	6.01337	6.3892	Serine
Delta_nirP1	18.2851	37.5628	6.48236	9.85901	10.9276
NirP1oex	17.2616	13.0833	7.7619	8.79858	9.24379
WT	40.4604	43.2738	20.7592	13.7586	12.3224	Alanine
ΔnirP1	35.6113	40.5409	15.6697	11.6258	13.6277
NirP1oex	22.5607	33.135	20.7949	25.2817	31.7184
WT	7.19145	9.82373	8.49292	7.07775	6.72701	Glycine*
ΔnirP1	6.82032	16.999	5.46015	7.72904	16.9537
NirP1oex	9.38282	6.93113	5.41582	5.45419	5.46374
WT	15.5485	24.6926	39.3161	32.7786	34.5798	Glutamine
ΔnirP1	25.0112	34.4834	40.708	28.5681	45.6569
NirP1oex	17.913	40.9286	13.2857	30.1139	16.5618
WT	9.29369	11.9303	10.043	8.81502	8.36182	Threonine
ΔnirP1	10.1238	14.067	7.98923	8.7283	8.483
NirP1oex	8.95275	8.91255	7.89573	8.43401	8.29507
WT	497.226	451.392	378.405	352.601	424.037	Glutamate
ΔnirP1	569.497	494.124	352.416	392.224	413.892
NirP1oex	581.72	534.942	407.396	608.603	718.694
WT	2.95015	3.48462	3.22978	1.18725	1.43233	Proline
ΔnirP1	3.64371	4.9412	2.72406	1.05703	1.17666
NirP1oex	3.92261	2.88605	2.15391	1.17558	0.959374
WT	15.5013	24.6953	39.216	33.3155	33.8557	Lysine
ΔnirP1	24.3458	34.1551	40.2664	27.9745	45.5304
NirP1oex	18.1545	40.6826	13.6121	30.4722	16.6247
WT	1.69883	3.00441	1.71931	1.22323	0.934106	Histidine
ΔnirP1	1.46612	5.17542	1.19069	1.21338	1.32954
NirP1oex	1.89938	1.9575	1.12128	1.23475	0.776923
WT	16.1534	10.31	12.4246	7.9906	8.52791	Arginine
ΔnirP1	20.3017	15.4846	15.7494	12.885	8.96899
NirP1oex	9.20033	11.1878	8.97201	5.55551	5.70505
WT	4.60614	4.90655	2.82706	2.28985	1.98227	Valine
ΔnirP1	4.99366	6.88133	2.39356	2.69422	2.53797
NirP1oex	5.29308	3.85776	3.72838	3.86883	5.03377
WT	2.17641	2.07781	1.57512	2.13986	1.60679	Methionine
ΔnirP1	2.79525	2.47513	1.60933	2.17196	1.80713
NirP1oex	1.73312	1.43634	1.47103	1.20495	0.534046
WT	2.614	2.6968	2.05074	2.5097	1.71062	Tyrosine
ΔnirP1	2.38098	4.03876	1.44618	1.73557	1.57393
NirP1oex	3.01724	2.52755	2.03933	2.34108	2.21156
WT	2.93219	3.46624	2.27189	2.06104	1.42373	Isoleucine
ΔnirP1	3.28186	5.04931	1.86496	2.06185	1.98422
NirP1oex	3.73849	2.59737	2.34135	2.30365	2.56099
WT	3.46902	3.76964	2.15862	2.83045	2.14447	Leucine
ΔnirP1	3.91529	5.23143	2.23369	2.54956	2.49882
NirP1oex	3.64171	3.06716	3.7076	3.62168	3.67121
WT	2.76648	3.09663	2.11987	3.26514	2.14259	Phenylalanine
ΔnirP1	2.65409	4.78338	2.01056	2.71909	2.52103
NirP1oex	3.3027	2.77108	2.27029	2.245	1.99061
WT	1.40645	1.45705	1.2079	1.79846	2.33634	Tryptophan
ΔnirP1	1.54201	3.23697	1.44053	2.1916	3.19482
NirP1oex	1.94117	1.64504	1.1285	1.23846	1.75222

## Sheet: Statistics
Single amino acids																Total amino acid
	WT																WT
							Strange value			Strange value			Strange value	Strange value									Strange value			Strange value
	0zu1	0zu3	0zu12	0zu24	1zu3	1zu12	1zu24	3zu12	3zu24	12zu24							0zu1	0zu3	0zu12	0zu24	1zu3	1zu12	1zu24	3zu12	3zu24	12zu24
Asparagine	0.743694	0.409169	0.911511	0.944741	0.644949	0.783654	0.671885	0.285053	0.0667358	0.75975							0.599115	0.163485	0.0691337	0.109268	0.189327	0.0674092	0.747538	0.379642	0.983804	0.326794
Aspartate	0.132244	0.255267	0.0832611	0.0929869	0.01818	0.0187609	0.00703423	0.0513762	0.0577074	0.0822866		*		0.05
Serine	0.327189	0.121206	0.0450171	0.0484047	0.0727382	0.0558536	0.0585323	0.0959092	0.102312	0.472523		**		0.01
Alanine	0.609783	0.0333995	0.00375611	0.00199489	0.0780553	0.084989	0.0729799	0.136924	0.0758505	0.294497		***		0.001			ΔnirP1
Glycine*	0.12631	0.238941	0.855714	0.636414	0.308475	0.120208	0.0954423	0.214873	0.202041	0.715349													Strange value			Strange value
Glutamine	0.192802	0.219998	0.218327	0.0571818	0.367771	0.463332	0.0685676	0.6433	0.70687	0.844896							0zu1	0zu3	0zu12	0zu24	1zu3	1zu12	1zu24	3zu12	3zu24	12zu24
Threonine	0.0988545	0.577358	0.658922	0.390767	0.242765	0.0746475	0.0489284	0.396347	0.278035	0.650401							0.917214	0.00214376	0.0255183	0.120452	0.0958368	0.13067	0.258233	0.621108	0.349272	0.521601
Glutamate	0.049664	0.183594	0.118131	0.235042	0.281875	0.161585	0.510174	0.62654	0.425655	0.213437
Proline	0.621022	0.877381	0.0519177	0.0164034	0.894009	0.211225	0.227409	0.389355	0.427188	0.298676
Lysine	0.207007	0.207431	0.231684	0.0692574	0.359099	0.470375	0.0749988	0.67546	0.664216	0.956579							NirP1oex
Histidine	0.129244	0.971729	0.316804	0.166653	0.202792	0.0215854	0.0435275	0.447372	0.293819	0.258353							0zu1	0zu3	0zu12	0zu24	1zu3	1zu12	1zu24	3zu12	3zu24	12zu24
Arginine	0.340254	0.459355	0.225963	0.257994	0.637193	0.609289	0.685392	0.0803267	0.0773006	0.692676							0.790154	0.0165301	0.879416	0.157974	0.0160626	0.743969	0.127504	0.0487506	0.0127859	0.287488
Valine	0.759311	0.0146719	0.0120707	0.00907385	0.218689	0.176425	0.158157	0.0365089	0.0156853	0.0903122
Methionine	0.586969	0.236653	0.862477	0.110781	0.298831	0.747143	0.0753863	0.249881	0.927019	0.141207
Tyrosine	0.862957	0.369668	0.832143	0.250644	0.042519	0.44857	0.0573309	0.186109	0.100068	0.12654
Isoleucine	0.376726	0.160771	0.128502	0.0414259	0.1431	0.109502	0.106242	0.6103	0.139462	0.227756
Leucine	0.586374	0.000254161	0.0156586	0.0340946	0.153218	0.252186	0.140775	0.0204546	0.8865	0.0451602
Phenylalanine	0.544578	0.306282	0.398778	0.344052	0.0802596	0.582792	0.124137	0.0556447	0.930287	0.0534202
Tryptophan	0.95431	0.270042	0.56033	0.320655	0.290186	0.606323	0.342741	0.0876988	0.535357	0.114641							0h		1h		3h		12h		24h
																	WTzuKO0	WTzuOEX0	WTzuKO1	WTzuOEX1	WTzuKO3	WTzuOEX3	WTzuKO12	WTzuOEX12	WTzuKO24	WTzuOEX24
	ΔnirP1																0.0488772	0.168853	0.407831	0.158439	0.539846	0.599422	0.453912	0.0630342	0.651278	0.0280358
	0zu1	0zu3	0zu12	0zu24	1zu3	1zu12	1zu24	3zu12	3zu24	12zu24
Asparagine	0.356737	0.527699	0.281818	0.393863	0.457869	0.577893	0.515885	0.276928	0.653966	0.736596
Aspartate	0.852542	0.0639773	0.0142961	0.0140755	0.328696	0.449624	0.388681	0.228344	0.452736	0.21472							OEXzuKO0	OEXzuKO1	OEXzuKO3	OEXzuKO12	OEXzuKO24
Serine	0.58492	0.002916	0.0285702	0.280635	0.434357	0.470432	0.480924	0.11353	0.425396	0.814025							0.670258	0.849444	0.646679	0.0921879	0.10108
Alanine	0.53699	0.00936952	0.00710169	0.0612025	0.129939	0.120401	0.0876621	0.148187	0.563729	0.572424
Glycine*	0.49814	0.42191	0.562686	0.503503	0.459315	0.529072	0.99778	0.113366	0.464415	0.534479
Glutamine	0.266578	0.0598301	0.624712	0.12443	0.408707	0.494227	0.28266	0.216773	0.546542	0.160568
Threonine	0.53613	0.0706724	0.383783	0.468762	0.398773	0.433967	0.41361	0.59333	0.799549	0.905969
Glutamate	0.0944733	0.0129741	0.045798	0.0932532	0.010898	0.148165	0.243132	0.349512	0.300529	0.659238
Proline	0.641388	0.261221	0.0882747	0.070015	0.476049	0.309582	0.305521	0.0115274	0.186688	0.855361
Lysine	0.21693	0.0432518	0.617601	0.131369	0.367695	0.461752	0.268483	0.221524	0.528408	0.156808
Histidine	0.514381	0.0983984	0.460685	0.813811	0.491603	0.493057	0.50157	0.937554	0.810709	0.846552
Arginine	0.268569	0.386277	0.149168	0.0820596	0.952291	0.40835	0.133858	0.536016	0.255099	0.1667
Valine	0.664555	0.0465363	0.0283782	0.052615	0.398585	0.419665	0.406308	0.161456	0.764703	0.747729
Methionine	0.370906	0.0221946	0.0552296	0.23813	0.107544	0.400407	0.324026	0.110958	0.716967	0.538513
Tyrosine	0.611052	0.0521713	0.109018	0.256973	0.471136	0.508804	0.484595	0.0781825	0.791356	0.741235
Isoleucine	0.622938	0.045258	0.0581294	0.188833	0.438149	0.459161	0.447074	0.548047	0.849957	0.897999
Leucine	0.669492	0.0130091	0.0130721	0.0368837	0.417031	0.451419	0.445088	0.188799	0.353178	0.830377
Phenylalanine	0.581407	0.321784	0.886214	0.837181	0.499103	0.591667	0.561994	0.0893756	0.453761	0.731844
Tryptophan	0.553495	0.270096	0.843627	0.785707	0.503412	0.562131	0.573439	0.189035	0.397501	0.87128
	NirP1oex
	0zu1	0zu3	0zu12	0zu24	1zu3	1zu12	1zu24	3zu12	3zu24	12zu24
Asparagine	0.41208	0.165863	0.218332	0.181572	0.161727	0.258258	0.18594	0.398979	0.902855	0.16091
Aspartate	0.0238136	0.0241755	0.0183572	0.193252	0.0226505	0.0429406	0.25732	0.021526	0.0718503	0.131075
Serine	0.0624107	0.0519895	0.0338919	0.0209672	0.100442	0.0913058	0.082486	0.608777	0.46499	0.773904
Alanine	0.0271435	0.500718	0.118263	0.0162478	0.0421012	0.0788883	0.430065	0.238687	0.063564	0.0644816
Glycine*	0.209508	0.0831852	0.107535	0.132098	0.17888	0.115795	0.0274332	0.94855	0.930742	0.977862
Glutamine	0.00784796	0.00761459	0.272966	0.811038	0.00229474	0.302028	0.112047	0.203521	0.593695	0.203773
Threonine	0.966754	0.323612	0.565917	0.619227	0.293039	0.553818	0.631141	0.319386	0.736699	0.904833
Glutamate	0.333099	0.0925031	0.681433	0.0599896	0.130893	0.339714	0.0368084	0.148158	0.0485805	0.218927
Proline	0.20811	0.107831	0.0734863	0.071282	0.0757262	0.0212019	0.0122791	0.0173444	0.0195109	0.11649
Lysine	0.0199176	0.0540562	0.263716	0.779735	0.00319627	0.306173	0.103014	0.196116	0.606615	0.189069
Histidine	0.819734	0.142539	0.402578	0.0783774	0.157147	0.387325	0.0101648	0.866537	0.390883	0.533982
Arginine	0.491319	0.947814	0.309197	0.299694	0.514527	0.0357594	0.0428959	0.380241	0.381294	0.894564
Valine	0.281948	0.237524	0.285035	0.76969	0.675179	0.872381	0.00468999	0.652414	0.0950993	0.0133809
Methionine	0.248736	0.284132	0.0989231	0.0226964	0.620115	0.196242	0.0566877	0.168845	0.0569125	0.0525271
Tyrosine	0.217844	0.166448	0.233355	0.188804	0.281435	0.621708	0.418998	0.502018	0.68181	0.753928
Isoleucine	0.205796	0.112684	0.166111	0.146026	0.487366	0.0181338	0.925454	0.903728	0.637008	0.55755
Leucine	0.385272	0.920243	0.969992	0.955801	0.326631	0.214569	0.20641	0.864949	0.942033	0.400607
Phenylalanine	0.219435	0.103294	0.131811	0.050824	0.0715394	0.111687	0.0798954	0.826581	0.319771	0.372347
Tryptophan	0.0823535	0.00418266	0.000114809	0.0499383	0.0541931	0.0405338	0.0339404	0.0410489	0.345653	0.779724
	0h		1h		3h			12h		24h
	WTzuKO0	WTzuOEX0	WTzuKO1	WTzuOEX1	WTzuKO3	WTzuOEX3	WTzuKO12	WTzuOEX12	WTzuKO24	WTzuOEX24
Asparagine	0.761674	0.24278	0.439563	0.680944	0.189356	0.0936239	0.172099	0.256132	0.43431	0.0367946
Aspartate	0.0632712	0.0329378	0.649689	0.102593	0.849031	0.235005	0.0275633	0.00171815	0.0566257	0.0243859
Serine	0.302181	0.193514	0.675933	0.0643889	0.0939774	0.070905	0.109766	0.207171	0.420123	0.154584
Alanine	0.0254689	0.00275764	0.731771	0.219795	0.137202	0.98958	0.0223997	0.000930341	0.696612	0.00365569
Glycine*	0.796863	0.190539	0.608263	0.161604	0.0690634	0.0657476	0.340526	0.0872225	0.501241	0.321612
Glutamine	0.154953	0.572829	0.293682	0.00190214	0.908605	0.223763	0.686212	0.799246	0.293498	0.125886
Threonine	0.410649	0.74578	0.71347	0.0679864	0.224787	0.235321	0.949695	0.672458	0.949822	0.956401
Glutamate	0.119171	0.185197	0.0288403	0.184586	0.595611	0.563617	0.404031	0.0650813	0.838204	0.0169714
Proline	0.339081	0.184659	0.607219	0.587802	0.784016	0.5897	0.464838	0.880999	0.706743	0.13266
Lysine	0.172163	0.563993	0.266283	0.00414053	0.928292	0.219296	0.636509	0.79719	0.280515	0.122029
Histidine	0.542064	0.611922	0.675319	0.0528832	0.42833	0.372118	0.972942	0.985708	0.5385	0.456547
Arginine	0.429192	0.243823	0.336276	0.835556	0.488179	0.364682	0.103106	0.220788	0.795193	0.139263
Valine	0.251506	0.495744	0.651426	0.396503	0.112769	0.131627	0.0617228	0.0134118	0.369396	0.00115252
Methionine	0.0641613	0.137373	0.304641	0.0447738	0.924014	0.769378	0.857655	0.0415432	0.712585	0.0495528
Tyrosine	0.646277	0.477377	0.671725	0.511146	0.0219492	0.972691	0.132011	0.648313	0.777773	0.29239
Isoleucine	0.318975	0.24835	0.654525	0.263582	0.340235	0.856597	0.998098	0.526491	0.445812	0.150023
Leucine	0.120035	0.753863	0.639399	0.294185	0.311059	0.160229	0.225984	0.00405997	0.250158	0.0321354
Phenylalanine	0.849037	0.371491	0.651157	0.341051	0.688229	0.596913	0.0961199	0.0778632	0.547829	0.532479
Tryptophan	0.536551	0.338128	0.589426	0.925292	0.783105	0.141355	0.891364	0.0444136	0.490057	0.11106
	KOzuOEX0	KOzuOEX1	KOzuOEX3	KOzuOEX12	KOzuOEX24
Asparagine	0.207716	0.503565	0.0911037	0.126017	0.217559
Aspartate	0.106039	0.8459	0.402016	0.0643069	0.07046
Serine	0.327128	0.50982	0.510198	0.520811	0.717289
Alanine	0.00489405	0.403166	0.164742	0.000776548	0.0637532
Glycine*	0.215634	0.50283	0.947729	0.0757064	0.464714
Glutamine	0.255019	0.413713	0.0551824	0.857811	0.0642461
Threonine	0.289785	0.449262	0.872503	0.819173	0.926386
Glutamate	0.726747	0.362417	0.0925805	0.0868785	0.0224255
Proline	0.669596	0.500672	0.0844167	0.488318	0.745708
Lysine	0.245651	0.364887	0.0471659	0.772134	0.0665516
Histidine	0.240529	0.559272	0.829558	0.974362	0.433418
Arginine	0.0743965	0.256097	0.245931	0.0914197	0.191412
Valine	0.738648	0.522489	0.109204	0.0266296	0.087817
Methionine	0.0299515	0.125547	0.470664	0.0248728	0.178061
Tyrosine	0.104541	0.638213	0.260646	0.259146	0.309681
Isoleucine	0.432937	0.522087	0.295534	0.230047	0.432532
Leucine	0.634506	0.519121	0.164898	0.047343	0.0917098
Phenylalanine	0.28532	0.599422	0.21123	0.117341	0.428504
Tryptophan	0.159349	0.584429	0.201706	0.112699	0.188603

## Sheet: Urea_cycle
Measurements
	0001 WT1 0h	0002 WT2 0h	0003 WT1 1h	0004 WT2 1h	0005 WT1 3h	0006 WT2 3h	0007 WT1 12h	0008 WT2 12h	0009 WT1 24h	0010 WT2 24h	0011 ΔnirP1_1 0h Δ	0012 ΔnirP1_2 0h	0013 ΔnirP1_1 1h	0014 ΔnirP1_2 1h	0015 ΔnirP1_1 3h	0016 ΔnirP1_2 3h	0017 ΔnirP1_1 12h	0018 ΔnirP1_2 12h	0019 ΔnirP1_1 124	0020 ΔnirP1_2 124	0021 NirP1oex1 0h	0022 NirP1oex2 0h	0023 NirP1oex1 1h	0024 NirP1oex2 1h	0025 NirP1oex1 3h	0026 NirP1oex2 3h	0027 NirP1oex1 12h	0028 NirP1oex2 12h	0029 NirP1oex1 24h	0030 NirP1oex2 24h
Ornithine	48.5662	45.0064	73.3889	99.3485	71.844	53.2028	39.6422	50.7023	52.4307	59.0911	31.9096	39.5658	30.4265	28.2766	38.9124	31.996	51.735	46.1822	53.9243	85.0997	63.7618	62.3064	60.5434	54.5396	47.066	32.5519	61.1371	56.7257	53.4887	72.991
Citrulline	7.13713	7.54816	14.0035	12.3009	16.7266	15.7543	11.1024	15.3976	12.8004	11.0056	9.01646	9.44539	7.62626	8.06169	12.8168	9.99584	10.072	10.459	11.4779	16.7107	8.57665	8.52495	9.09152	11.0931	5.35912	7.40768	4.50167	5.45496	3.34895	5.32527
Arginosuccinat	0.791712	0.549932	0.489136	0.21272	0.616037	0.542836	0.180976	0.31303	0.42867	0.289886	0.645458	0.814784	0.530852	0.946871	0.820923	1.29319	0.390083	0.807043	0.169327	0.275497	0.35944	0.522594	0.421369	0.41886	0.533741	0.737141	0.317674	0.411078	0.331311	0.339256
Arginine	19.4997	12.8072	13.6194	7.00056	13.2378	11.6114	6.98414	8.99707	8.99583	8.05999	17.8956	22.7078	13.4632	17.506	12.4914	19.0074	11.5921	14.1778	7.66408	10.2739	7.22002	11.1806	10.5096	11.866	6.61427	11.3297	5.19176	5.91926	4.83467	6.57544
Aspartate	28.333	23.27	33.2334	35.7656	22.0893	19.3448	7.52769	8.31465	14.356	12.3549	46.6041	45.2273	56.1904	29.2964	16.8605	23.0356	25.7788	28.3026	23.3654	23.6895	51.6532	49.2897	40.2007	38.6441	24.3689	23.9473	33.9163	35.1265	42.0699	46.7937
Average
	WT 0h	Std	WT 1h	Std	WT 3h	Std	WT 12h	Std	WT 24h	Std	ΔnirP1 0h	Std	ΔnirP1 1h	Std	ΔnirP1 3h	Std	ΔnirP1 12h	Std	ΔnirP1 24h	Std	NirP1oex 0h	Std	NirP1oex 1h	Std	NirP1oex 3h	Std	NirP1oex 12h	Std	NirP1oex 24h	Std
Ornithine	46.7863	1.7799	86.3687	12.9798	62.5234	9.32059	45.1723	5.53003	55.7609	3.33017	35.7377	3.82806	29.3515	1.07493	35.4542	3.45816	48.9586	2.7764	69.512	15.5877	63.0341	0.727677	57.5415	3.00191	39.8089	7.25704	58.9314	2.20572	63.2399	9.75112
Citrulline	7.34264	0.205516	13.1522	0.851329	16.2405	0.486132	13.25	2.14758	11.903	0.897382	9.23092	0.214467	7.84398	0.217715	11.4063	1.41048	10.2655	0.193531	14.0943	2.61642	8.5508	0.0258498	10.0923	1.0008	6.3834	1.02428	4.97832	0.476646	4.33711	0.988161
Arginosuccinate	0.670822	0.12089	0.350928	0.138208	0.579436	0.0366001	0.247003	0.0660269	0.359278	0.0693916	0.730121	0.0846632	0.738861	0.20801	1.05705	0.236131	0.598563	0.20848	0.222412	0.0530854	0.441017	0.0815772	0.420115	0.00125412	0.635441	0.1017	0.364376	0.0467021	0.335283	0.00397213
Arginine	16.1534	3.34625	10.31	3.30943	12.4246	0.813171	7.9906	1.00647	8.52791	0.467916	20.3017	2.40611	15.4846	2.0214	15.7494	3.25801	12.885	1.29285	8.96899	1.30491	9.20033	1.98031	11.1878	0.678183	8.97201	2.35774	5.55551	0.363753	5.70505	0.870388
Aspartate	25.8015	2.53149	34.4995	1.26611	20.717	1.37225	7.92117	0.39348	13.3555	1.00052	45.9157	0.688402	42.7434	13.447	19.948	3.08758	27.0407	1.26189	23.5275	0.162043	50.4715	1.18175	39.4224	0.778316	24.1581	0.210779	34.5214	0.6051	44.4318	2.36192
																					Statistics
	0h	1h	3h	12h	24h																WTzuKO0	WTzuOEX0	WTzuKO1	WTzuOEX1	WTzuKO3	WTzuOEX3	WTzuKO12	WTzuOEX12	WTzuKO24	WTzuOEX24
WT	46.7863	86.3687	62.5234	45.1723	55.7609	Ornithine														Ornithine	0.169481	0.0410452	0.140411	0.119476	0.179174	0.201992	0.621405	0.209868	0.536895	0.580898
ΔnirP1	35.7377	28.2766	35.4542	48.9586	69.512															Citrulline	0.0239704	0.102823	0.0849693	0.0391574	0.151396	0.0329263	0.395637	0.147783	0.552159	0.0303671
NirP1oex	63.0341	57.5415	39.8089	58.9314	63.2399															Arginosuccinate	0.730657	0.272405	0.278246	0.24994	0.286331	0.68084	0.322949	0.296563	0.265926	0.788092
WT	7.34264	13.1522	16.2405	13.25	11.903	Citrulline														Arginine	0.429192	0.243823	0.336276	0.776141	0.488179	0.364682	0.103106	0.220788	0.795193	0.139263
ΔnirP1	9.23092	7.84398	11.4063	10.2655	14.0943															Aspartate	0.0632712	0.0329378	0.649689	0.0708143	0.849031	0.235005	0.0275633	0.00171815	0.0566257	0.0243859
NirP1oex	8.5508	10.0923	6.3834	4.97832	4.33711
WT	0.670822	0.350928	0.579436	0.247003	0.359278	Arginosuccinate
ΔnirP1	0.730121	0.738861	1.05705	0.598563	0.222412
NirP1oex	0.441017	0.420115	0.635441	0.364376	0.335283
WT	16.1534	10.31	12.4246	7.9906	8.52791	Arginine															KOzuOEX0	KOzuOEX1	KOzuOEX3	KOzuOEX12	KOzuOEX24
ΔnirP1	20.3017	15.4846	15.7494	12.885	8.96899															Ornithine	0.079588	0.0441964	0.660209	0.112649	0.770873
NirP1oex	9.20033	11.1878	8.97201	5.55551	5.70505															Citrulline	0.190105	0.254686	0.113507	0.0320121	0.133062
WT	25.8015	34.4995	20.717	7.92117	13.3555	Aspartate														Arginosuccinate	0.133309	0.36808	0.296755	0.457494	0.278377
ΔnirP1	45.9157	42.7434	19.948	27.0407	23.5275															Arginine	0.0743965	0.256097	0.245931	0.0914197	0.191412
NirP1oex	50.4715	39.4224	24.1581	34.5214	44.4318															Aspartate	0.106039	0.8459	0.402016	0.0643069	0.07046
																			WTzuKO0	WTzuOEX0	WTzuKO1	WTzuOEX1	WTzuKO3	WTzuOEX3	WTzuKO12	WTzuOEX12	WTzuKO24	WTzuOEX24
																			#DIV/0!	#DIV/0!	#DIV/0!	#DIV/0!	#DIV/0!	#DIV/0!	#DIV/0!	#DIV/0!	#DIV/0!	#DIV/0!
																			KOzuOEX0	KOzuOEX1	KOzuOEX3	KOzuOEX12	KOzuOEX24
																			#DIV/0!	#DIV/0!	#DIV/0!	#DIV/0!	#DIV/0!
